# Supplementary material
Source: HighWire-hosted journal article supplement (https://www.cmaj.ca/highwire/filestream/59032/field_highwire_adjunct_files/1/five-wu-2-at.pdf)
Supplement: five-wu-2-at.pdf [file five-wu-2-at.pdf]

## Appendix 2: References for Five things to know about carbon monoxide poisoning

1. Weaver LK. Carbon monoxide poisoning. *N Engl J Med* 2009;360:1217-25.
2. Health Canada. *Environmental and workplace health — carbon monoxide*. Available: [www.hc-sc.gc.ca/ewh-semt/air/in/poll/combustion/carbon-eng.php](http://www.hc-sc.gc.ca/ewh-semt/air/in/poll/combustion/carbon-eng.php) (accessed 2013 June 16).
3. Gorman DF, Clayton D, Gilligan JE, et al. A longitudinal study of 100 consecutive admissions for carbon monoxide poisoning to the Royal Adelaide Hospital. *Anaesth Intensive Care* 1992;20:311-6.
4. Roth D, Herkner H, Screiber W, et al. Accuracy of noninvasive multiwave pulse oximetry compared with carboxyhemoglobin from blood gas analysis in unselected emergency department patients. *Ann Emerg Med* 2011;58:74-9.
5. Buckley NA, Juurlink DN, Isbister G, et al. Hyperbaric oxygen for carbon monoxide poisoning. *Cochrane Database Syst Rev* 2011;(4):CD002041.
6. Lawson-Smith P, Jansen EC, Hyldegaard O. Cyanide intoxication as part of smoke inhalation — a review on diagnosis and treatment from the emergency perspective. *Scand J Trauma Resusc Emerg Med* 2011;19:14.
